1 Title: COVID-19 booster vaccine attitudes and behaviors among university students and staff:  
2 the USC Trojan Pandemic Research Initiative

3 Ryan C. Lee, BA<sup>1</sup>, Howard Hu, MD, MPH, ScD<sup>1</sup>, Eric S. Kawaguchi, PhD<sup>1</sup>, Andre. E Kim,  
4 PhD<sup>1</sup>, Daniel W. Soto, MPH<sup>1</sup>, Kush Shanker, BS<sup>1</sup>, Jeffrey D. Klausner, MD, MPH<sup>1</sup>, Sarah Van  
5 Orman, MD<sup>2</sup>, and Jennifer B. Unger, PhD<sup>1</sup>

6 1. Department of Population and Public Health Sciences, Keck School of Medicine, University  
7 of Southern California, Los Angeles California

8 2. Family Medicine, Keck Medicine of USC, Los Angeles, California

9 **Abstract:**

10 Introduction. Although COVID-19 vaccines significantly reduce morbidity and mortality, recent  
11 evidence suggests that immunity wanes after 6-9 months, and that a third vaccine dose could  
12 further reduce COVID-19 transmission and severe illness. However, previous studies have not  
13 assessed attitudes about getting booster doses. This study examined COVID-19 booster vaccine  
14 attitudes and behaviors among university students and staff in the fall of 2021.

15 Methods. Participants responded to an email invitation and completed electronic surveys.

16 Results. In our sample, 96.2% of respondents indicated willingness to get a COVID-19 booster  
17 shot at least once per year. In both bivariate and multivariate analyses higher trust in science was  
18 associated with having higher odds of booster willingness. Those who identify as Black, on  
19 average, reported trusting science less than other racial/ethnic groups.

20 Conclusions. Our findings demonstrate high willingness to receive a COVID-19 booster shot and  
21 highlight the importance of educational and motivational messages that focus on trust in science  
22 to increase willingness to get the COVID-19 booster. More research is needed to better  
23 understand the impact of cultural beliefs on booster willingness and vaccine hesitancy. This

24 understanding will help determine what messages and populations to target to increase booster  
25 willingness in the future.

26

## 27 **Introduction**

28 Although the Pfizer and Moderna COVID-19 vaccines significantly reduce morbidity and  
29 mortality, recent evidence suggests that immunity wanes after 6-9 months, and that a third  
30 vaccine dose could further reduce COVID-19 transmission and severe illness.<sup>1,2,3</sup> Numerous  
31 articles have reported hesitancy to get the first or second dose.<sup>4,5</sup> However, previous studies  
32 have not assessed attitudes about getting booster doses. Hesitancy to get booster doses could  
33 result from reluctance to get vaccines frequently, severe side effects from previous vaccines, and  
34 concerns about the fairness of getting a third dose when other people lack access to any doses.

35

36 As COVID-19 boosters become more widely available to the general public, information about  
37 attitudes toward third vaccine doses could inform the design of health communication messages  
38 for more hesitant groups. Using data from an ongoing survey of university students and staff, we  
39 assessed attitudes toward third vaccine doses and the demographic correlates of these attitudes.  
40 We hypothesized an overall high willingness to get a COVID-19 booster shot because the sample  
41 was from a population of college students and staff/faculty in Los Angeles, where vaccination  
42 rates were relatively high. However, we also hypothesized some sub-groups may have lower  
43 booster willingness compared to others. For example, the high level of vaccine hesitancy among  
44 Black Americans (referred to as Blacks in the remaining part of this paper) may suggest there  
45 will be a lower booster willingness as well.<sup>6</sup>

46

47 **Methods**

48 Participants

49 The participants in our study were students, staff, and faculty at the University of Southern  
50 California (USC) in Los Angeles, California. Participants were eligible if they were currently  
51 employed or enrolled at USC, were at least 18 years of age, and provided informed consent.

52

53 Procedure

54 This study was approved by the USC Institutional Review Board. In August - November 2021,  
55 we conducted a survey of students, staff, and faculty who were a part of the Trojan Pandemic  
56 Response Initiative Health Cohort. We emailed 5,256 students, staff, and faculty (2,876 students,  
57 2,380 staff/faculty) to complete an online survey and received 3,923 responses (75% response  
58 rate).

59

60 Measures

61 The survey assessed demographic characteristics including self-identified race and ethnicity,  
62 gender identity, age, and student/staff status. We also assessed self-reported prior COVID-19  
63 infection status and self-reported vaccination status. We assessed respondents' trust in science  
64 using Nadelson's Trust in Science Scale.<sup>7</sup> As the main outcome variable, the survey asked how  
65 often participants would be willing to get a COVID-19 booster vaccination. Booster willingness  
66 was coded as "willing" (any response other than "never") and "unwilling" ("never").

67

68 Data analysis

69 Bivariate logistic regression models were run to examine the marginal effects of demographic  
70 and psychosocial correlates on booster willingness among those who were fully vaccinated and  
71 completed all the measures of interest (N = 3,668). A multivariable model was run to estimate  
72 effects adjusting for confounding by the other variables in the model. We reported unadjusted  
73 and adjusted odds ratios and their respective 95% confidence intervals.

74

## 75 **Results**

76 Of the 3,668 respondents, 96.2% indicated willingness to get a COVID-19 booster shot at least  
77 once per year, and nearly two-thirds were willing to get boosters as often as necessary (after  
78 removing those with missing data) (**Table 1**). In bivariate analyses, those without prior COVID-  
79 19 infections had higher odds of booster willingness compared to those with self-reported prior  
80 COVID-19 infection (OR = 1.99; 95% CI = 1.24-3.07), and higher trust in science was  
81 associated with having higher odds of booster willingness (OR = 8.36; 95% CI = 6.10-11.60)  
82 (**Table 2**).

83

84 In multivariate analyses, controlling for confounding by the other variables in the model, Asians  
85 had over twice the odds of reporting being willing to get at least one COVID-19 booster  
86 compared to Whites (OR = 2.45; 95% CI = 1.46-4.18) and stronger trust in science was  
87 associated with higher odds (OR = 8.73; 95% CI = 6.29-12.30) (**Table 2**). Notably, we did not  
88 detect a significant association between Black race and booster willingness in both the bivariate  
89 and multivariate analyses, despite our original hypothesis. To examine any racial and ethnic  
90 differences in trust in science, we conducted a post hoc Kruskal Wallance test ( $p < 0.001$ ). Blacks  
91 reported lower trust in science than other racial/ethnic groups (**Figure 1**). Additionally, those

92 who were willing to get a booster trusted science more, on average, than those who were not  
93 willing among all race/ethnicity groups (**Figure 2**).

94

## 95 **Discussion**

96 While our sample is at a higher education setting, thus limiting generalizability, our results  
97 demonstrate high willingness to receive a COVID-19 booster shot. Our findings also highlight  
98 the importance of educational and motivational messages that focus on trust in science to  
99 increase willingness to get the COVID-19 booster. This is especially important in addressing  
100 previously reported COVID-19 vaccine hesitancy among African Americans.<sup>6</sup> However, more  
101 research is needed to better understand the impact of cultural beliefs on booster willingness and  
102 vaccine hesitancy, especially given the historical trauma and legacy of racism African Americans  
103 have faced from the scientific/medical field. This understanding will help determine what  
104 messages and interventions to prioritize to increase booster willingness in the future.

105

106 Though much more work is needed to determine booster willingness at a national level, these  
107 findings are a first step in understanding peoples' thoughts and opinions about COVID-19  
108 booster shots. These results indicate the vast majority of students and staff would be willing to  
109 receive additional vaccine doses if recommended. Future research should examine the  
110 demographic correlates of actually receiving booster doses, which might be lower than  
111 willingness and intentions. Conversely, in settings where the vast majority of people are willing  
112 to get boosters, it will be important to monitor vaccination records to make sure that people do  
113 not obtain boosters more frequently than recommended, which could increase the risk of side  
114 effects without providing additional protection from COVID-19.

115

116 Limitations

117 This analysis was based on a non-random sample of university students, staff, and faculty who  
118 responded to an online survey. Findings may not generalize to the general population.

119

120 **Conclusions**

121 This study demonstrates an overall high COVID-19 booster willingness among University  
122 students, staff, and faculty and highlights the importance of educational and motivational  
123 messages that focus on trust in science to increase willingness to get the COVID-19 booster.  
124 Future research and public health efforts should be put on fostering trust among people who are  
125 wary of science and the COVID-19 pandemic.

126

127 **Acknowledgements**

128 This research has been funded by the University of Southern California Office of the Provost and  
129 the Keck Medicine Foundation. E. Kawaguchi is funded by the NIH T32ES013678. A. Kim is  
130 funded by the USC Environmental Health Biostatistics Core (P30 ES007048).

131

132  
133  
134  
135  
136  
137  
138  
139  
140  
141  
142  
143  
144  
145  
146  
147  
148  
149  
150  
151  
152  
153  
154  
155

## References

1. Choi A, Koch M, Wu K, et al. Safety and immunogenicity of SARS-CoV-2 variant mRNA vaccine boosters in healthy adults: an interim analysis. *Nat Med.* 2021;27(11): 2025–2031. doi:10.1038/s41591-021-01527-y
2. Bar-On YM, Goldberg Y, Mandel M, et al. Protection of BNT162b2 Vaccine Booster against Covid-19 in Israel. *N Engl J Med.* 2021;385:1393-1400. doi:10.1056/NEJMoa2114255
3. Mahase E. Covid-19: Booster dose reduces infections and severe illness in over 60s, Israeli study reports. *BMJ.* 2021;374:n2297. doi:[10.1136/bmj.n2297](https://doi.org/10.1136/bmj.n2297)
4. AlShurman BA, Khan AF, Mac C, Majeed M, Butt ZA. What Demographic, Social, and Contextual Factors Influence the Intention to Use COVID-19 Vaccines: A Scoping Review. *Int J Environ Res Public Health.* 2021;18(17):9342. doi:[10.3390/ijerph18179342](https://doi.org/10.3390/ijerph18179342)
5. Cascini F, Pantovic A, Al-Ajlouni Y, Failla G, Ricciardi W. Attitudes, acceptance and hesitancy among the general population worldwide to receive the COVID-19 vaccines and their contributing factors: A systematic review. *EClinicalMedicine.* 2021;40:101113. doi:[10.1016/j.eclinm.2021.101113](https://doi.org/10.1016/j.eclinm.2021.101113)
6. Khubchandani J, Macias Y. COVID-19 vaccination hesitancy in Hispanics and African-Americans: A review and recommendations for practice. *Brain, Behavior, & Immunity - Health.* 2021;15:100277. doi:[10.1016/j.bbih.2021.100277](https://doi.org/10.1016/j.bbih.2021.100277)
7. Nadelson L, Jorcyk C, Yang D, et al. I Just Don't Trust Them: The Development and Validation of an Assessment Instrument to Measure Trust in Science and Scientists. *School Science and Mathematics.* 2014;114(2):76-86. doi:[10.1111/ssm.12051](https://doi.org/10.1111/ssm.12051)



156 **Table 1. Booster Willingness Among Students, Staff, and Faculty at a Los Angeles**  
 157 **University.** Responses from 3,668 participants to the question: “How often would you be willing  
 158 to get a COVID-19 booster, if offered?”. Self-identified gender excludes any “other” category.

|                                | <b>Willing<br/>(n = 3530)</b> | <b>Unwilling<br/>(n = 138)</b> | <b>P-value</b> |
|--------------------------------|-------------------------------|--------------------------------|----------------|
| <b>Booster Willingness</b>     |                               |                                |                |
| <i>As many times as needed</i> | 2346 (64.0%)                  |                                |                |
| <i>Three times a year</i>      | 23 (0.6%)                     |                                |                |
| <i>Twice per year</i>          | 207 (5.6%)                    |                                |                |
| <i>Once per year</i>           | 954 (26.0%)                   |                                |                |
| <i>Never</i>                   |                               | 138 (3.8%)                     |                |
| <b>Gender</b>                  |                               |                                | 0.09           |
| <i>Ref = Female</i>            | 2360 (96.6%)                  | 82 (3.4%)                      |                |
| <i>Male</i>                    | 1170 (95.4%)                  | 56 (4.6%)                      |                |
| <b>Age Group</b>               |                               |                                | 0.92           |
| <i>Ref = 18-23</i>             | 1131 (96.5%)                  | 41 (3.5%)                      |                |
| <i>24-39</i>                   | 1545 (96.1%)                  | 62 (3.9%)                      |                |
| <i>40-49</i>                   | 386 (95.8%)                   | 17 (4.2%)                      |                |
| <i>50+</i>                     | 468 (96.3%)                   | 18 (3.7%)                      |                |
| <b>Race/Ethnicity</b>          |                               |                                | 0.004          |
| <i>Ref = White</i>             | 1220 (96.4%)                  | 45 (3.6%)                      |                |
| <i>Asian</i>                   | 1123 (97.7%)                  | 27 (2.3%)                      |                |
| <i>Black</i>                   | 186 (93.9%)                   | 12 (6.1%)                      |                |
| <i>Latinx</i>                  | 740 (95.1%)                   | 38 (4.9%)                      |                |
| <i>Other/Multiracial</i>       | 261 (94.2%)                   | 16 (5.8%)                      |                |
| <b>Prior COVID Infection</b>   |                               |                                | 0.002          |
| <i>Ref = Yes</i>               | 373 (93.7%)                   | 25 (6.3%)                      |                |
| <i>No</i>                      | 2933 (96.7%)                  | 99 (3.3%)                      |                |
| <i>Don't Know</i>              | 224 (94.1%)                   | 14 (5.9%)                      |                |

|                                           |              |             |         |
|-------------------------------------------|--------------|-------------|---------|
| <b>Division</b>                           |              |             | 0.32    |
| <i>Ref = Staff</i>                        | 1550 (95.9%) | 67 (4.1%)   |         |
| <i>Student</i>                            | 1980 (96.5%) | 71 (3.5%)   |         |
| <b>Trust in Science Score - mean (sd)</b> | 4.08 (0.52)  | 3.39 (0.62) | < 0.001 |

160 **Table 2. Univariate and Multivariate Correlates of Booster Willingness**

|                                          | Bivariate Analysis |                   | Multivariate Analysis |                   |
|------------------------------------------|--------------------|-------------------|-----------------------|-------------------|
|                                          | Odds Ratio         | 95% CI            | Odds Ratio            | 95% CI            |
| <b>Gender (Ref = Female)</b>             | 0.73               | 0.51-1.03         | 0.86                  | 0.59-1.26         |
| <b>Age Group (Ref = 18-23)</b>           | 1.0 (ref)          |                   | 1.0 (ref)             |                   |
| <i>24-39</i>                             | 0.90               | 0.60-1.34         | 1.03                  | 0.63-1.67         |
| <i>40-49</i>                             | 0.82               | 0.47-1.50         | 1.15                  | 0.54-2.52         |
| <i>50+</i>                               | 0.94               | 0.54-1.70         | 1.86                  | 0.86-4.14         |
| <b>Race/Ethnicity (Ref = White)</b>      |                    |                   | 1.0 (ref)             |                   |
| <i>Asian</i>                             | 1.53               | 0.95-2.52         | <b>2.45</b>           | <b>1.46-4.18</b>  |
| <i>Black</i>                             | 0.57               | 0.31-1.15         | 1.12                  | 0.57-2.36         |
| <i>Latinx</i>                            | 0.72               | 0.46-1.12         | 1.21                  | 0.74-1.97         |
| <i>Other/Multiracial</i>                 | 0.60               | 0.34-1.11         | 0.75                  | 0.41-1.43         |
| <b>Prior COVID Infection (Ref = Yes)</b> |                    |                   | 1.0 (ref)             |                   |
| <i>No</i>                                | <b>1.99</b>        | <b>1.24-3.07</b>  | 1.35                  | 0.81-2.17         |
| <i>Don't Know</i>                        | 1.07               | 0.55-2.16         | 0.91                  | 0.45-1.94         |
| <b>Division = Student (Ref = Staff)</b>  | 1.21               | 0.86-1.69         | 1.26                  | 0.75-2.10         |
| <b>Trust in Science Score</b>            | <b>8.36</b>        | <b>6.10-11.60</b> | <b>8.73</b>           | <b>6.29-12.30</b> |

161

162

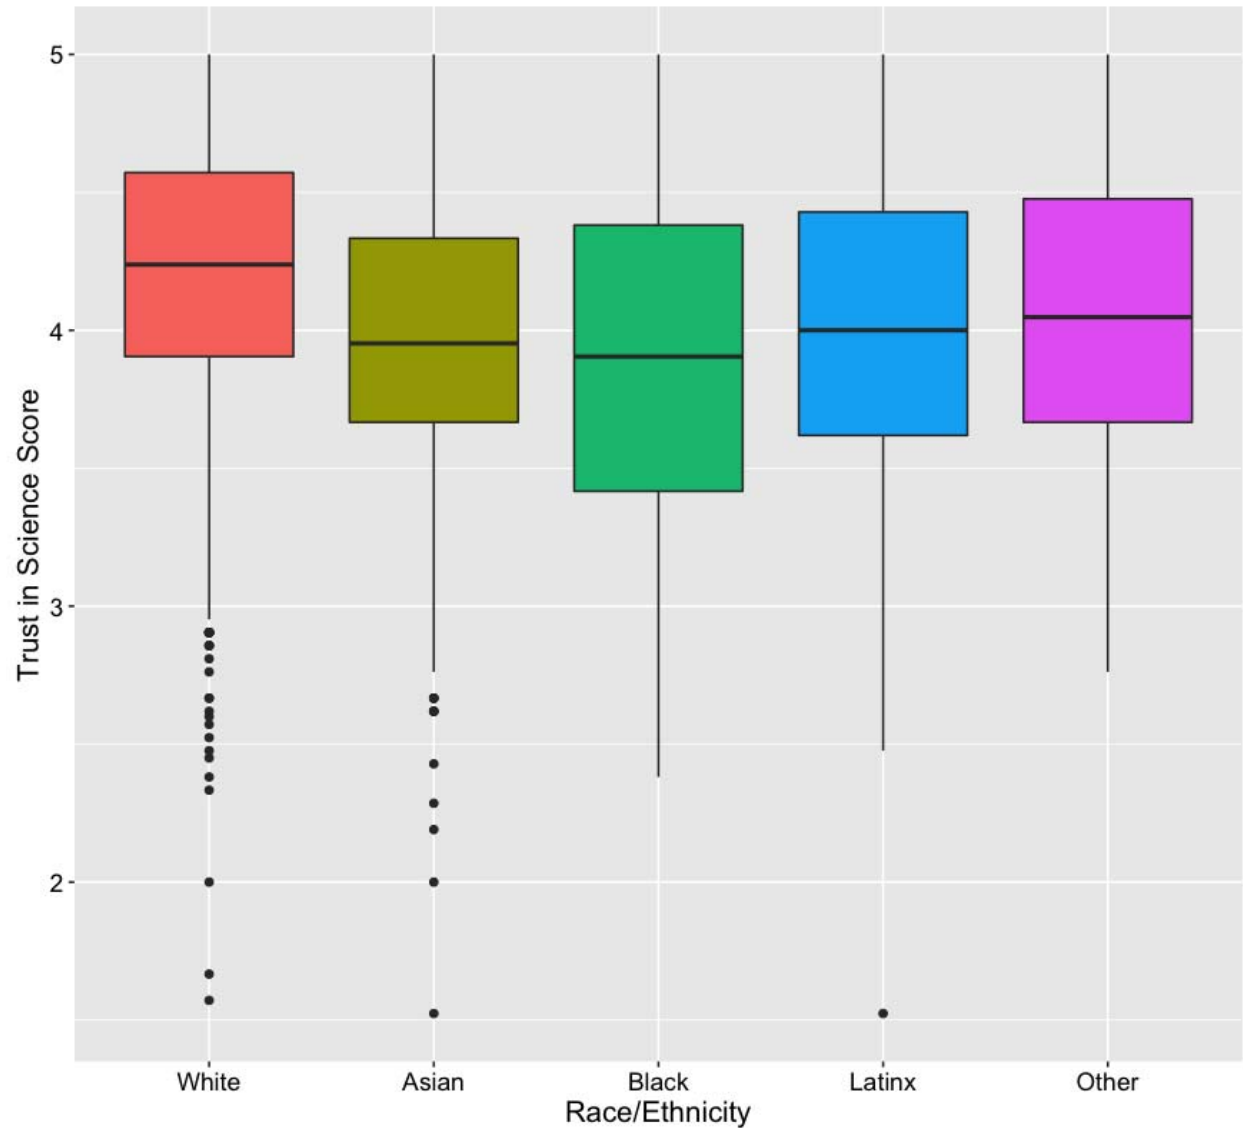

163  
164 **Figure 1. Trust in Science Scores by Racial/Ethnic Groups.** Black respondents had  
165 a significantly lower mean trust in science score compared to all other racial/ethnic  
166 groups (Kruskal Wallis test  $p < 0.001$ ; Blacks vs. All Other Racial/Ethnic groups  
167  $p < 0.001$ ).  
168

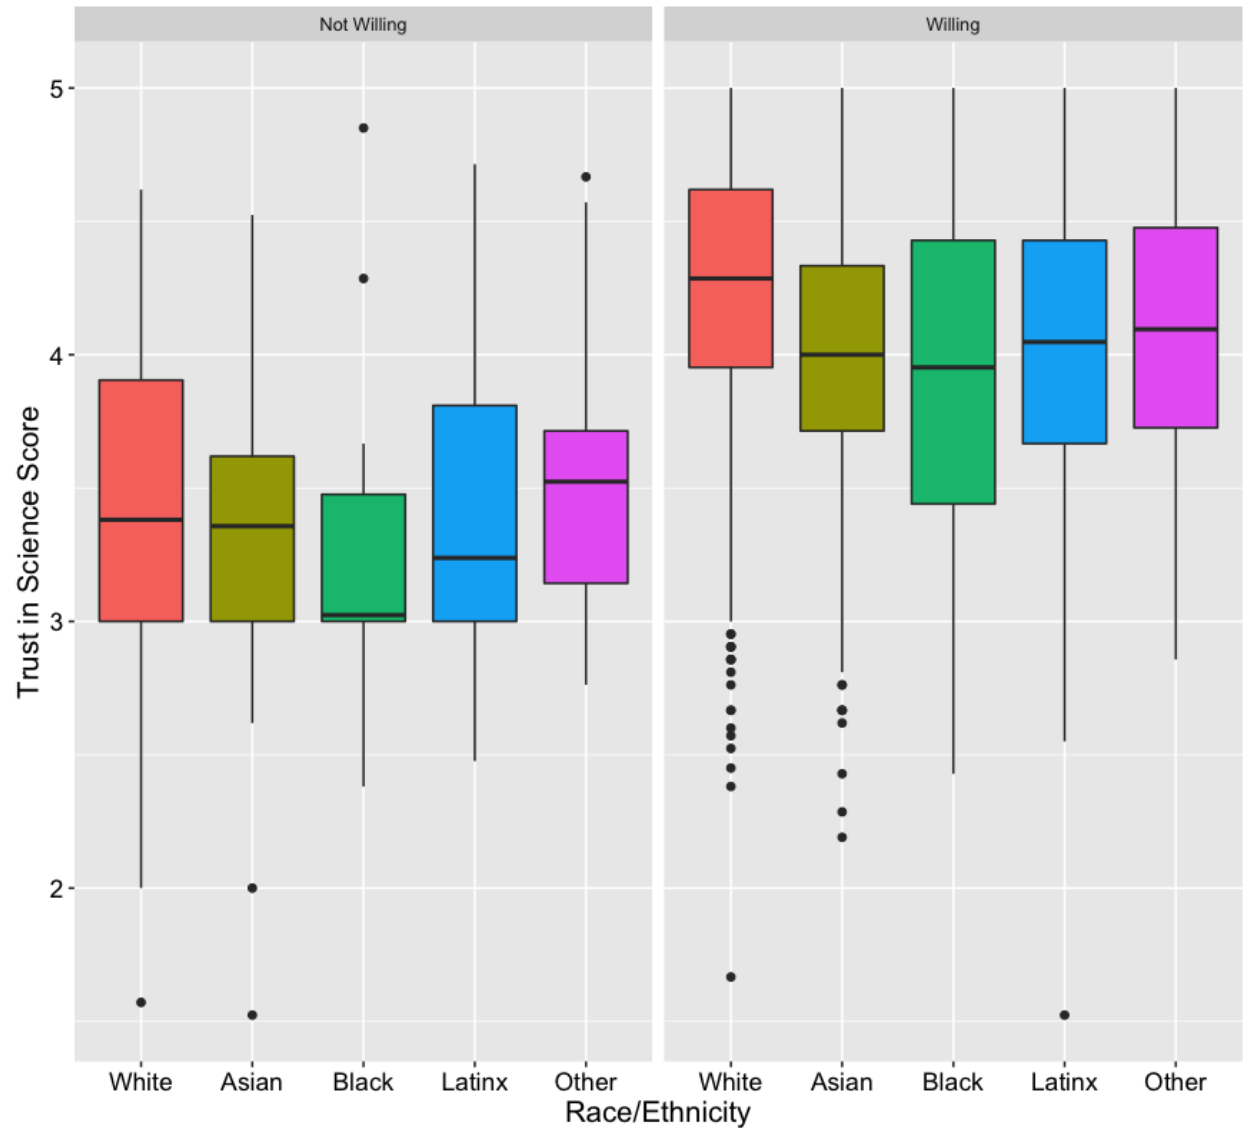

169  
170  
171  
172  
173

**Figure 2. Trust in Science Scores by Racial/Ethnic Groups Stratified by Booster Willingness Status.** On average, those who were willing to get a booster shot trusted science more than those who were not willing among all race/ethnicity groups.
